# Supplementary material for: Determination of furfurals in baby food samples after extraction by a novel functionalized magnetic porous carbon
Source: Royal Society of Chemistry journal article supplement (doi:10.1039/d2ra02481k), 2022-01-01
Supplement: d2ra02481k1.pdf [file d2ra02481k1.pdf]

1 **A novel polypyrrole-polyaniline functionalized magnetic porous carbon material for the**  
2 **extraction/determination of furfurals in baby food and dry milk samples**

3 Dorsa Davari<sup>1</sup>, Mohammad Rabbani<sup>\*2</sup>, Afshin Akhondzadeh<sup>3</sup>, Mohammad Kazem Koohi<sup>4</sup>,

4 *<sup>1</sup> Department of Food Science and Technology, Tehran North Branch, Islamic Azad University,*  
5 *Tehran, Iran*

6 *<sup>2</sup> Department of Marine Chemistry, Faculty of Marine Science and Technology, North Tehran*  
7 *Branch, Islamic Azad University, Tehran, Iran.*

8 *<sup>3</sup> Department of Food Hygiene, Faculty of Veterinary Medicine, University of Tehran, Tehran, Iran.*

9 *<sup>4</sup> Department of Basic Sciences, Faculty of Veterinary Medicine, University of Tehran, Tehran, Iran.*

10  
11  
12  
13  
14 **Running title: Synthesis and application of a novel functionalized magnetic porous carbon**

15  
16  
17  
18  
19  
20  
21  
22  
23  
24  
25 \* Corresponding author

26 E-mail: m.rabbani.iau@gmail.com; Tel: +98 22173060

27 **Table S1:** ANOVA for response surface quadratic model.

Analysis of variance table [Partial sum of squares - Type III]

| Source                   | Sum of Squares | df | Mean Square | F Value | p-value Prob > F |                 |
|--------------------------|----------------|----|-------------|---------|------------------|-----------------|
| Block                    | 0.030          | 1  | 0.030       |         |                  |                 |
| Model                    | 0.54           | 20 | 0.027       | 70.23   | < 0.0001         | significant     |
| <i>A-pH</i>              | 0.33           | 1  | 0.33        | 853.58  | < 0.0001         |                 |
| <i>B-Sample vol</i>      | 0.082          | 1  | 0.082       | 213.98  | < 0.0001         |                 |
| <i>C-Sorbent conc</i>    | 1.443E-003     | 1  | 1.443E-003  | 3.78    | 0.0617           |                 |
| <i>D-Adsorption time</i> | 0.017          | 1  | 0.017       | 43.95   | < 0.0001         |                 |
| <i>E-Eluent vol</i>      | 8.132E-003     | 1  | 8.132E-003  | 21.29   | < 0.0001         |                 |
| <i>AB</i>                | 1.876E-004     | 1  | 1.876E-004  | 0.49    | 0.4890           |                 |
| <i>AC</i>                | 7.037E-005     | 1  | 7.037E-005  | 0.18    | 0.6709           |                 |
| <i>AD</i>                | 2.022E-004     | 1  | 2.022E-004  | 0.53    | 0.4727           |                 |
| <i>AE</i>                | 4.099E-005     | 1  | 4.099E-005  | 0.11    | 0.7456           |                 |
| <i>BC</i>                | 1.994E-004     | 1  | 1.994E-004  | 0.52    | 0.4758           |                 |
| <i>BD</i>                | 1.091E-005     | 1  | 1.091E-005  | 0.029   | 0.8670           |                 |
| <i>BE</i>                | 1.118E-004     | 1  | 1.118E-004  | 0.29    | 0.5927           |                 |
| <i>CD</i>                | 2.103E-004     | 1  | 2.103E-004  | 0.55    | 0.4640           |                 |
| <i>CE</i>                | 1.423E-004     | 1  | 1.423E-004  | 0.37    | 0.5464           |                 |
| <i>DE</i>                | 1.993E-004     | 1  | 1.993E-004  | 0.52    | 0.4759           |                 |
| <i>A<sup>2</sup></i>     | 9.800E-003     | 1  | 9.800E-003  | 25.65   | < 0.0001         |                 |
| <i>B<sup>2</sup></i>     | 9.402E-003     | 1  | 9.402E-003  | 24.61   | < 0.0001         |                 |
| <i>C<sup>2</sup></i>     | 4.299E-003     | 1  | 4.299E-003  | 11.26   | 0.0022           |                 |
| <i>D<sup>2</sup></i>     | 1.786E-003     | 1  | 1.786E-003  | 4.68    | 0.0390           |                 |
| <i>E<sup>2</sup></i>     | 0.020          | 1  | 0.020       | 53.34   | < 0.0001         |                 |
| Residual                 | 0.011          | 29 | 3.820E-004  |         |                  |                 |
| <i>Lack of Fit</i>       | 7.494E-003     | 22 | 3.406E-004  | 0.67    | 0.7821           | not significant |
| <i>Pure Error</i>        | 3.583E-003     | 7  | 5.119E-004  |         |                  |                 |
| Cor Total                | 0.58           | 50 |             |         |                  |                 |

28
